# Supplementary material for: Synthesis, Crystal Study, and Anti-Proliferative Activity of Some 2-Benzimidazolylthioacetophenones towards Triple-Negative Breast Cancer MDA-MB-468 Cells as Apoptosis-Inducing Agents
Source: Int J Mol Sci. 2016 Jul 29;17(8):1221. doi: 10.3390/ijms17081221 (PMC5000619; doi:10.3390/ijms17081221)
Supplement: Supplementary file 1 [file ijms-17-01221-s001.pdf]

# Supplementary Materials: Synthesis, Crystal Study, and Anti-Proliferative Activity of Some 2-Benzimidazolylthioacetophenones towards Triple-Negative Breast Cancer MDA-MB-468 Cells as Apoptosis-Inducing Agents

Hatem A. Abdel-Aziz, Wagdy M. Eldehna, Hazem Ghabbour, Ghada H. Al-Ansary, Areej M. Assaf and Abdullah Al-Dhfyane

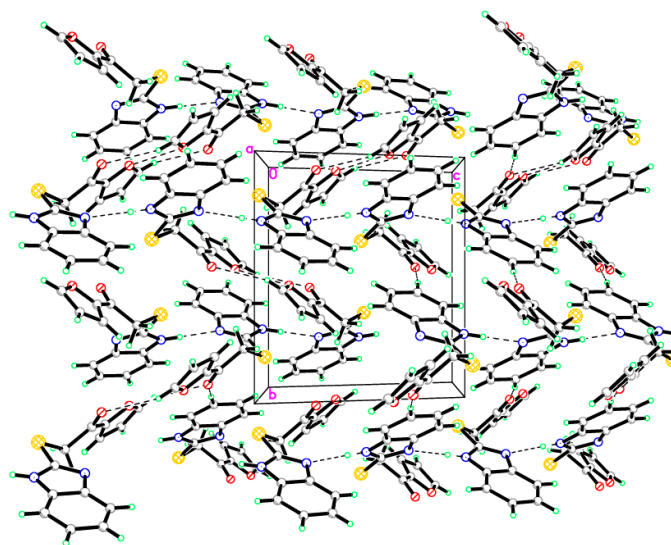

**Figure S1.** Molecular packing of compound 5v viewed hydrogen bonds, which are drawn as dashed lines making a network structure.

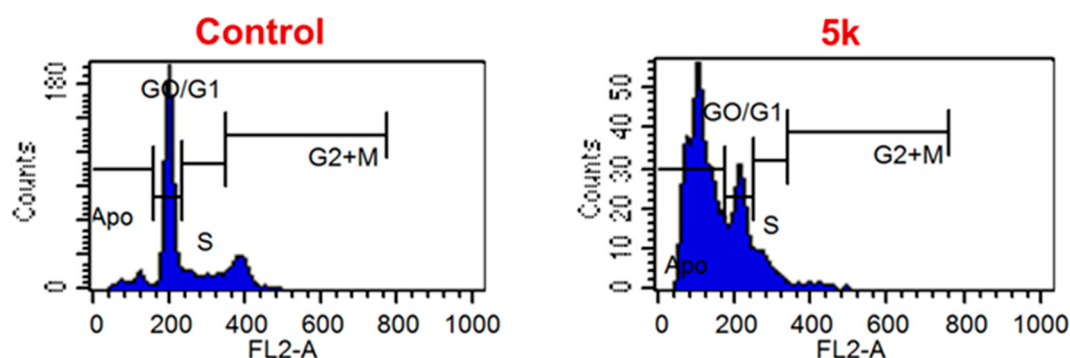

**Figure S2.** DNA-flow cytometry analysis for MDA-MB-468 cells treated with compound 5k for 24 h at its IC<sub>50</sub> concentration. The experiment was done in triplicate.

**Table S1.** Hydrogen-bond geometry (Å, °) for compound 5v.

| <i>D</i> — <i>H</i> ... <i>A</i> | <i>D</i> — <i>H</i> | <i>H</i> ... <i>A</i> | <i>D</i> ... <i>A</i> | <i>D</i> — <i>H</i> ... <i>A</i> |
|----------------------------------|---------------------|-----------------------|-----------------------|----------------------------------|
| N2—H2B...N1 <sup>i</sup>         | 0.8800              | 2.0000                | 2.867 (5)             | 169.00                           |
| C3—H3A...O2 <sup>ii</sup>        | 0.9500              | 2.5700                | 3.359 (6)             | 141.00                           |
| C11—H11A...O2 <sup>iii</sup>     | 0.9500              | 2.4700                | 3.411 (7)             | 170.00                           |

Symmetry codes: <sup>i</sup> *x*, *−y* + 1/2, *z* − 1/2; <sup>ii</sup> *−x* + 1, *−y* + 1, *−z* + 2; <sup>iii</sup> *−x* + 2, *y* − 1/2, *−z* + 3/2.
